# Supplementary material for: Combined virtual and experimental screening of multicomponent crystals of 2,4-dichlorophenoxyacetic acid
Source: Royal Society of Chemistry journal article supplement (doi:10.1039/d2nj00536k), 2022-01-01
Supplement: d2nj00536k1.pdf [file d2nj00536k1.pdf]

# Combined virtual and experimental screening multicomponent crystals of 2,4- Dichlorophenoxyacetic acid

Jiulong Li<sup>a</sup>, Chang Li<sup>a</sup>, Xu Ji<sup>a</sup>, Qin Sun<sup>b</sup>, Zhi Li<sup>c</sup>, He Liu<sup>d</sup>, Lina Zhou<sup>a,e</sup>, Dingding

Jing<sup>f</sup>, Junbo Gong<sup>a,e</sup>, Wei Chen<sup>a,e,\*</sup>

<sup>a</sup> School of Chemical Engineering and Technology, Tianjin University, Tianjin 300072,  
PR China

<sup>b</sup> Shenyang Sinochem Agrochemicals R&D Co., Ltd., Shenyang, Liaoning 110021, PR  
China

<sup>c</sup> School of Pharmaceutical Science and Technology, Tianjin University, Tianjin  
300072, PR China

<sup>d</sup> Beijing Chao-Yang Hospital affiliated with Beijing Capital Medical University,  
Beijing 100020, PR China

<sup>e</sup> National Collaborative Innovation Centre of Chemical Science and Engineering,  
Tianjin 300072, PR China

<sup>f</sup> Asymchem Life Science Tianjin Co., Ltd., Tianjin 300457, PR China

\*Corresponding Author, E-mail: chenwei@tju.edu.cn; Tel.: +86-22-2740-5754

## Contents

- Table S1** The preparation conditions for multicomponent crystals
- Table S2** HPLC method parameters for 2,4-D.
- Table S3** COSMO-RS calculation and MC analysis results of 2,4-D with coformers.
- Table S4** Parameters (Å, Degree) of the hydrogen bonds.
- Table S5** Equilibrium solubility of pure 2,4-D and its multicomponent crystals in the water at 25°C.
- Table S6** The water solubilities of the coformers of all salts.
- Table S7** The pH of a saturated solution at 25°C.
- Figure S1** PXRD patterns of LAG experiment product with new phases.
- Figure S2** PXRD patterns of LAG experiment product without new phases.
- Figure S3** PXRD patterns of multicomponent crystals (black and blue represent the results of slurry suspension experiments and software calculations, respectively).
- Figure S4** DSC curves of 2,4-D, (2,4-D)<sup>-</sup>(PZ)<sup>+</sup>, (2,4-D)<sup>-</sup>(BZ)<sup>+</sup>, (2,4-D)<sup>-</sup>(ABA)<sup>+</sup>, (2,4-D)<sup>-</sup>(PPD)<sup>+</sup>, (2,4-D)<sup>-</sup>(OPD)<sup>+</sup>, and 2,4-D-EB.
- Figure S5** DSC curves of coformers in all multicomponent crystals.
- Figure S6** TGA and DSC curves of (2,4-D)<sup>-</sup>(ABA)<sup>+</sup>.
- Figure S7** FTIR spectra of the starting materials and multicomponent crystals.
- Figure S8** The PXRD patterns of 2,4-D and multicomponent crystals before (black) and after (blue) equilibrium solubility experiment.
- Figure S9** The standard curve of pure 2,4-D solubility.
- Figure S10** The PXRD patterns of 2,4-D and multicomponent crystals before (black) and after (blue) accelerated stability experiment.
- Figure S11** The MEPs of multicomponent crystals.
- Figure S12** Hirshfeld 2D fingerprint plots of 2,4-D and multicomponent crystals.

**Table S1** The preparation conditions for multicomponent crystals

---

| Compound | Detail                   |
|----------|--------------------------|
|          | slurry suspension method |

---

|                                         |                                                                        |
|-----------------------------------------|------------------------------------------------------------------------|
| (2,4-D) <sup>-</sup> (PZ) <sup>+</sup>  | 2,4-D (884 mg, 4 mmol), PZ (172 mg 2 mmol), methanol (10 ml)           |
| (2,4-D) <sup>-</sup> (BZ) <sup>+</sup>  | 2,4-D (884 mg, 4 mmol), BZ (472 mg 4 mmol), acetonitrile (10 ml)       |
| (2,4-D) <sup>-</sup> (ABA) <sup>+</sup> | 2,4-D (884 mg, 4 mmol), ABA (548 mg 4 mmol), acetonitrile (10 ml)      |
| (2,4-D) <sup>-</sup> (PPD) <sup>+</sup> | 2,4-D (884 mg, 4 mmol), PPD (432 mg 4 mmol), ethanol (10 ml)           |
| (2,4-D) <sup>-</sup> (OPD) <sup>+</sup> | 2,4-D (884 mg, 4 mmol), OPD (432 mg 4 mmol), methanol (10 ml)          |
| 2,4-D-EB                                | 2,4-D (884 mg, 4 mmol), EB (660 mg 4 mmol), methanol (10 ml)           |
|                                         | slow solvent evaporation method                                        |
| (2,4-D) <sup>-</sup> (PZ) <sup>+</sup>  | 2,4-D (88.4 mg, 0.4 mmol), PZ (34.4 mg 0.4 mmol), methanol (4 ml)      |
| (2,4-D) <sup>-</sup> (BZ) <sup>+</sup>  | 2,4-D (88.4 mg, 0.4 mmol), BZ (47.2 mg 0.4 mmol), acetonitrile (4 ml)  |
| (2,4-D) <sup>-</sup> (ABA) <sup>+</sup> | 2,4-D (88.4 mg, 0.4 mmol), ABA (54.8 mg 0.4 mmol), acetonitrile (4 ml) |
| (2,4-D) <sup>-</sup> (PPD) <sup>+</sup> | 2,4-D (88.4 mg, 0.4 mmol), PPD (43.2 mg 0.4 mmol), ethanol (4 ml)      |
| (2,4-D) <sup>-</sup> (OPD) <sup>+</sup> | 2,4-D (88.4 mg, 0.4 mmol), OPD (43.2 mg 0.4 mmol), methanol (4 ml)     |
| 2,4-D-EB                                | 2,4-D (88.4 mg, 0.4 mmol), EB (66.0 mg 0.4 mmol), methanol (4 ml)      |

**Table S2** HPLC method parameters for 2,4-D.

| Parameter          | Details                                              |
|--------------------|------------------------------------------------------|
| Column             | C18 reverse phase column (4.6 mm × 250 mm, 5 μm)     |
| Mobile phase       | acetonitrile, water and acetic acid (v/v/v, 50:50:1) |
| Flow rate          | 1 mL/min                                             |
| Inject volume      | 20 μL                                                |
| Column temperature | 25 °C                                                |
| Sample temperature | 25 °C                                                |
| $\lambda_{\max}$   | 283 nm                                               |
| Retention time     | 8.4 min                                              |
| Calibration range  | 0.1 – 0.6 g/L                                        |

**Table S3** COSMO-RS calculation and MC analysis results of 2,4-D with cofomers.

|    | Cofomer                        | CAS No.    | $\Delta H_{ex}$ (kcal·mol <sup>-1</sup> ) | Hit Rate (%) | New form |
|----|--------------------------------|------------|-------------------------------------------|--------------|----------|
| 1  | piperazine                     | 110-85-0   | -5.502                                    | 100          | yes      |
| 2  | L-proline                      | 147-85-3   | -4.882                                    | 100          | yes      |
| 3  | 6-aminocaproic acid            | 60-32-2    | -4.762                                    | 100          | yes      |
| 4  | gabapentin                     | 60142-96-3 | -4.470                                    | 0            |          |
| 5  | L-glutamine                    | 56-85-9    | -4.103                                    | 0            |          |
| 6  | 4,4'-bipyridine <sup>1</sup>   | 553-26-4   | -3.920                                    | 100          | yes      |
| 7  | L-alanine                      | 56-41-7    | -3.570                                    | 0            |          |
| 8  | L-valine                       | 72-18-4    | -3.480                                    | 0            |          |
| 9  | L-histidine                    | 71-00-1    | -3.455                                    | 0            |          |
| 10 | L-asparagine                   | 70-47-3    | -3.396                                    | 0            |          |
| 11 | glycine                        | 56-40-6    | -3.226                                    | 0            |          |
| 12 | creatine                       | 57-00-1    | -3.198                                    | 0            |          |
| 13 | pyrazine <sup>2</sup>          | 290-37-9   | -2.662                                    | 100          | yes      |
| 14 | L-threonine                    | 6028-28-0  | -2.624                                    | 0            |          |
| 15 | imidazole <sup>3</sup>         | 288-32-4   | -2.560                                    | 100          | yes      |
| 16 | 2-ethoxybenzamide              | 938-73-8   | -2.513                                    | 100          | yes      |
| 17 | 3-aminobenzoic acid            | 99-05-8    | -2.484                                    | 100          | yes      |
| 18 | 1,2,4-triazole                 | 288-88-0   | -2.470                                    | 0            |          |
| 19 | 2-aminopyrimidine <sup>4</sup> | 109-12-6   | -2.409                                    | 100          | yes      |
| 20 | methylurea                     | 598-50-5   | -2.322                                    | 0            |          |
| 21 | <i>p</i> -phenylenediamine     | 106-50-3   | -2.279                                    | 100          | yes      |
| 22 | L-serine                       | 56-45-1    | -2.164                                    | 0            |          |
| 23 | 2-aminopyridine <sup>3</sup>   | 504-29-0   | -2.129                                    | 100          | yes      |
| 24 | benzimidazole                  | 51-17-2    | -2.082                                    | 100          | yes      |

|    |                              |            |        |     |     |
|----|------------------------------|------------|--------|-----|-----|
| 25 | isonicotinamide <sup>3</sup> | 1453-82-3  | -2.068 | 100 | yes |
| 26 | urea                         | 57-13-6    | -2.012 | 0   |     |
| 27 | L-aspartic acid              | 56-84-8    | -2.005 | 0   |     |
| 28 | pyrazinamide <sup>3</sup>    | 98-96-4    | -1.851 | 100 | yes |
| 29 | picolinamide                 | 1452-77-3  | -1.772 | 100 | yes |
| 30 | sulfanilic acid              | 121-57-3   | -1.586 | 100 | no  |
| 31 | <i>o</i> -phenylenediamine   | 95-54-5    | -1.556 | 100 | yes |
| 32 | theophylline                 | 58-55-9    | -1.525 | 100 | yes |
| 33 | taurine                      | 107-35-7   | -1.492 | 0   |     |
| 34 | mannitol                     | 87-78-5    | -1.196 | 0   |     |
| 35 | 6-hydroxypurine              | 68-94-0    | -1.038 | 100 | no  |
| 36 | 2,2'-bipyridine <sup>2</sup> | 366-18-7   | -0.969 | 100 | yes |
| 37 | 2-hydroxynicotinic acid      | 609-71-2   | -0.840 | 100 | no  |
| 38 | 2-hydroxybenzylamine         | 932-30-9   | -0.620 | 100 | yes |
| 39 | oxalic acid                  | 144-62-7   | -0.516 | 0   |     |
| 40 | 3-hydroxyisonicotinic acid   | 10128-71-9 | -0.253 | 100 | no  |
| 41 | 3,5-dinitrobenzoic acid      | 99-34-3    | -0.235 | 0   |     |
| 42 | 2-aminonicotinic acid        | 5345-47-1  | -0.202 | 100 | no  |
| 43 | malic acid                   | 6915-15-7  | -0.176 | 0   |     |
| 44 | malonic acid                 | 141-82-2   | -0.137 | 0   |     |
| 45 | 3-aminopyridine <sup>3</sup> | 462-08-8   | -0.085 | 100 | yes |
| 46 | 2-nitrobenzoic acid          | 552-16-9   | -0.033 | 0   |     |
| 47 | 3-methoxyphenol              | 150-19-6   | 0.006  |     |     |
| 48 | 3,4-dihydroxybenzoic acid    | 99-50-3    | 0.015  |     |     |
| 49 | caffeic acid                 | 331-39-5   | 0.017  |     |     |
| 50 | 2-nitrophenol                | 88-75-5    | 0.048  |     |     |
| 51 | tartaric acid                | 147-71-7   | 0.060  |     |     |

|    |                 |         |       |
|----|-----------------|---------|-------|
| 52 | saccharin       | 81-07-2 | 0.105 |
| 53 | barbituric acid | 67-52-7 | 0.222 |

**Table S4** Parameters (Å, Degree) of the hydrogen bonds.

| Compound                   | D-H...A                                            | D-H     | H...A   | D...A      | D-H...A   | symmetry            |
|----------------------------|----------------------------------------------------|---------|---------|------------|-----------|---------------------|
| (2,4-D)-(PZ) <sup>+</sup>  | N <sub>1</sub> -H <sub>1A</sub> ...O <sub>1</sub>  | 1.01(2) | 1.68(2) | 2.681(2)   | 174(2)    |                     |
|                            | N <sub>1</sub> -H <sub>1B</sub> ...O <sub>5</sub>  | 0.84(2) | 1.94(2) | 2.784(19)  | 179(2)    | 1-x,-y,1-z          |
|                            | N <sub>1</sub> -H <sub>2A</sub> ...O <sub>4</sub>  | 0.97(2) | 1.75(2) | 2.715(2)   | 173(2)    |                     |
|                            | N <sub>2</sub> -H <sub>2B</sub> ...O <sub>2</sub>  | 0.91(2) | 1.80(2) | 2.706(19)  | 172(2)    | 1-x,1-y,1-z         |
|                            | C <sub>4</sub> -H <sub>4A</sub> ...O <sub>2</sub>  | 0.97    | 2.37    | 3.267(2)   | 153       | -x,1-y,1-z          |
|                            | C <sub>2</sub> -H <sub>6B</sub> ...O <sub>5</sub>  | 0.97    | 2.41    | 3.289(2)   | 151       | 2-x,-y,1-z          |
| (2,4-D)-(BZ) <sup>+</sup>  | N <sub>1</sub> -H <sub>1</sub> ...O <sub>1</sub>   | 0.95(2) | 1.70(2) | 2.650(16)  | 177.0(19) |                     |
|                            | N <sub>1</sub> -H <sub>1</sub> ...O <sub>2</sub>   | 0.95(2) | 2.51(2) | 3.069(17)  | 117.2(16) | 3/2-x,-y,-1/2+z     |
|                            | N <sub>2</sub> -H <sub>2</sub> ...O <sub>2</sub>   | 0.89(2) | 1.89(2) | 2.683(17)  | 147(2)    | -1/2+x,1/2-y,1-z    |
|                            | C <sub>9</sub> -H <sub>7</sub> ...O <sub>2</sub>   | 0.93    | 2.56    | 3.087(2)   | 117       |                     |
| (2,4-D)-(ABA) <sup>+</sup> | N <sub>1</sub> -H <sub>1A</sub> ...O <sub>1</sub>  | 0.91(3) | 1.86(3) | 2.7713(19) | 175(2)    |                     |
|                            | N <sub>1</sub> -H <sub>1B</sub> ...O <sub>5</sub>  | 0.86(3) | 2.12(3) | 2.690(2)   | 124(2)    | -1/2+x,5/2-y,-1/2+z |
|                            | N <sub>1</sub> -H <sub>1C</sub> ...O <sub>1</sub>  | 0.90(3) | 1.90(3) | 2.7762(19) | 166(2)    | 3/2-x,1/2+y,1/2-z   |
|                            | N <sub>1</sub> -H <sub>1C</sub> ...O <sub>2</sub>  | 0.90(3) | 2.52(3) | 3.132(2)   | 126.4(19) | 3/2-x,1/2+y,1/2-z   |
|                            | O <sub>4</sub> -H <sub>2</sub> ...O <sub>2</sub>   | 0.80(3) | 1.84(3) | 2.633(2)   | 169(4)    | 1/2+x,3/2-y,1/2+z   |
|                            | C <sub>14</sub> -H <sub>9</sub> ...O <sub>4</sub>  | 0.93    | 2.53    | 3.369(2)   | 149       | x,1+y,z             |
|                            | C <sub>15</sub> -H <sub>10</sub> ...O <sub>1</sub> | 0.93    | 2.48    | 3.361(2)   | 159       | x,1+y,z             |
| (2,4-D)-(PPD) <sup>+</sup> | N <sub>1</sub> -H <sub>1A</sub> ...O <sub>2</sub>  | 0.89    | 1.87    | 2.724(2)   | 160       |                     |
|                            | N <sub>1</sub> -H <sub>1B</sub> ...O <sub>1</sub>  | 0.89    | 1.86    | 2.7476(19) | 174       | 2-x,1-y,-z          |

|                            |                             |           |           |            |           |                    |
|----------------------------|-----------------------------|-----------|-----------|------------|-----------|--------------------|
|                            | $N_1-H_{1C} \cdots O_1$     | 0.89      | 1.98      | 2.748(2)   | 144       | 1+x,y,z            |
|                            | $C_9-H_6 \cdots O_2$        | 0.93      | 2.53      | 3.265(2)   | 136       | 2-x,1-y,-z         |
| (2,4-D)-(OPD) <sup>+</sup> | $N_1-H_{1A} \cdots O_1$     | 0.911(18) | 0.911(18) | 2.7378(13) | 156.1(16) |                    |
|                            | $N_1-H_{1B} \cdots O_2$     | 0.922(16) | 1.957(16) | 2.8448(13) | 161.1(14) | 1-x,-1/2+y,1/2-z   |
|                            | $N_1-H_{1C} \cdots O_2$     | 0.929(15) | 1.929(15) | 2.8220(14) | 160.7(13) | x,3/2-y,1/2+z      |
|                            | $N_2-H_{2A} \cdots O_1$     | 0.870(18) | 2.068(18) | 2.9301(15) | 170.6(14) | x,3/2-y,1/2+z      |
| 2,4-D-EB                   | $O_1-H_1 \cdots O_4$        | 0.94(3)   | 1.64(3)   | 2.578(2)   | 175(4)    |                    |
|                            | $N_1-H_{2A} \cdots O_2$     | 0.90(3)   | 2.01(3)   | 2.887(3)   | 166(3)    |                    |
|                            | $N_1-H_{2B} \cdots O_5$     | 0.94(4)   | 1.87(3)   | 2.633(3)   | 137(4)    |                    |
|                            | $C_8-H_6 \cdots O_4$        | 0.93      | 2.57      | 3.478(4)   | 164       | 1/2-x,-1/2+y,3/2-z |
|                            | $C_{15}-H_{10} \cdots O_4$  | 0.93      | 2.37      | 2.719(3)   | 102       |                    |
|                            | $C_{17}-H_{12A} \cdots O_2$ | 0.96      | 2.56      | 3.417(4)   | 149       | 1/2-x,3/2-y,1-z    |

**Table S5** Equilibrium solubility of pure 2,4-D and its multicomponent crystals in the water at 25°C.

| Component                  | Solubility (g/L) |
|----------------------------|------------------|
| 2,4-D                      | 0.6914 ± 0.0039  |
| (2,4-D)-(PZ) <sup>+</sup>  | 2.7417 ± 0.0118  |
| (2,4-D)-(BZ) <sup>+</sup>  | 2.4590 ± 0.0094  |
| (2,4-D)-(ABA) <sup>+</sup> | 1.0464 ± 0.0062  |
| (2,4-D)-(PPD) <sup>+</sup> | 0.6350 ± 0.0031  |
| (2,4-D)-(OPD) <sup>+</sup> | 1.6883 ± 0.0088  |
| 2,4-D-EB                   | 0.3828 ± 0.0008  |

**Table S6** The water solubilities of the cofomers of all salts.

| Compounds        | solubility (g/L) |
|------------------|------------------|
| PZ <sup>5</sup>  | 190.7 (25°C)     |
| BZ <sup>6</sup>  | 7.6 (25°C)       |
| ABA <sup>7</sup> | 5.9 (25°C)       |
| PPD <sup>8</sup> | 47.2 (25°C)      |
| OPD <sup>9</sup> | 40.4 (35°C)      |

**Table S7** The pH of a saturated solution at 25°C.

| Solution                   | Final pH |
|----------------------------|----------|
| pure water                 | 7.18     |
| 2,4-D                      | 3.00     |
| (2,4-D)-(PZ) <sup>+</sup>  | 4.86     |
| (2,4-D)-(BZ) <sup>+</sup>  | 4.76     |
| (2,4-D)-(ABA) <sup>+</sup> | 3.51     |
| (2,4-D)-(PPD) <sup>+</sup> | 3.53     |
| (2,4-D)-(OPD) <sup>+</sup> | 4.37     |
| 2,4-D-EB                   | 3.20     |



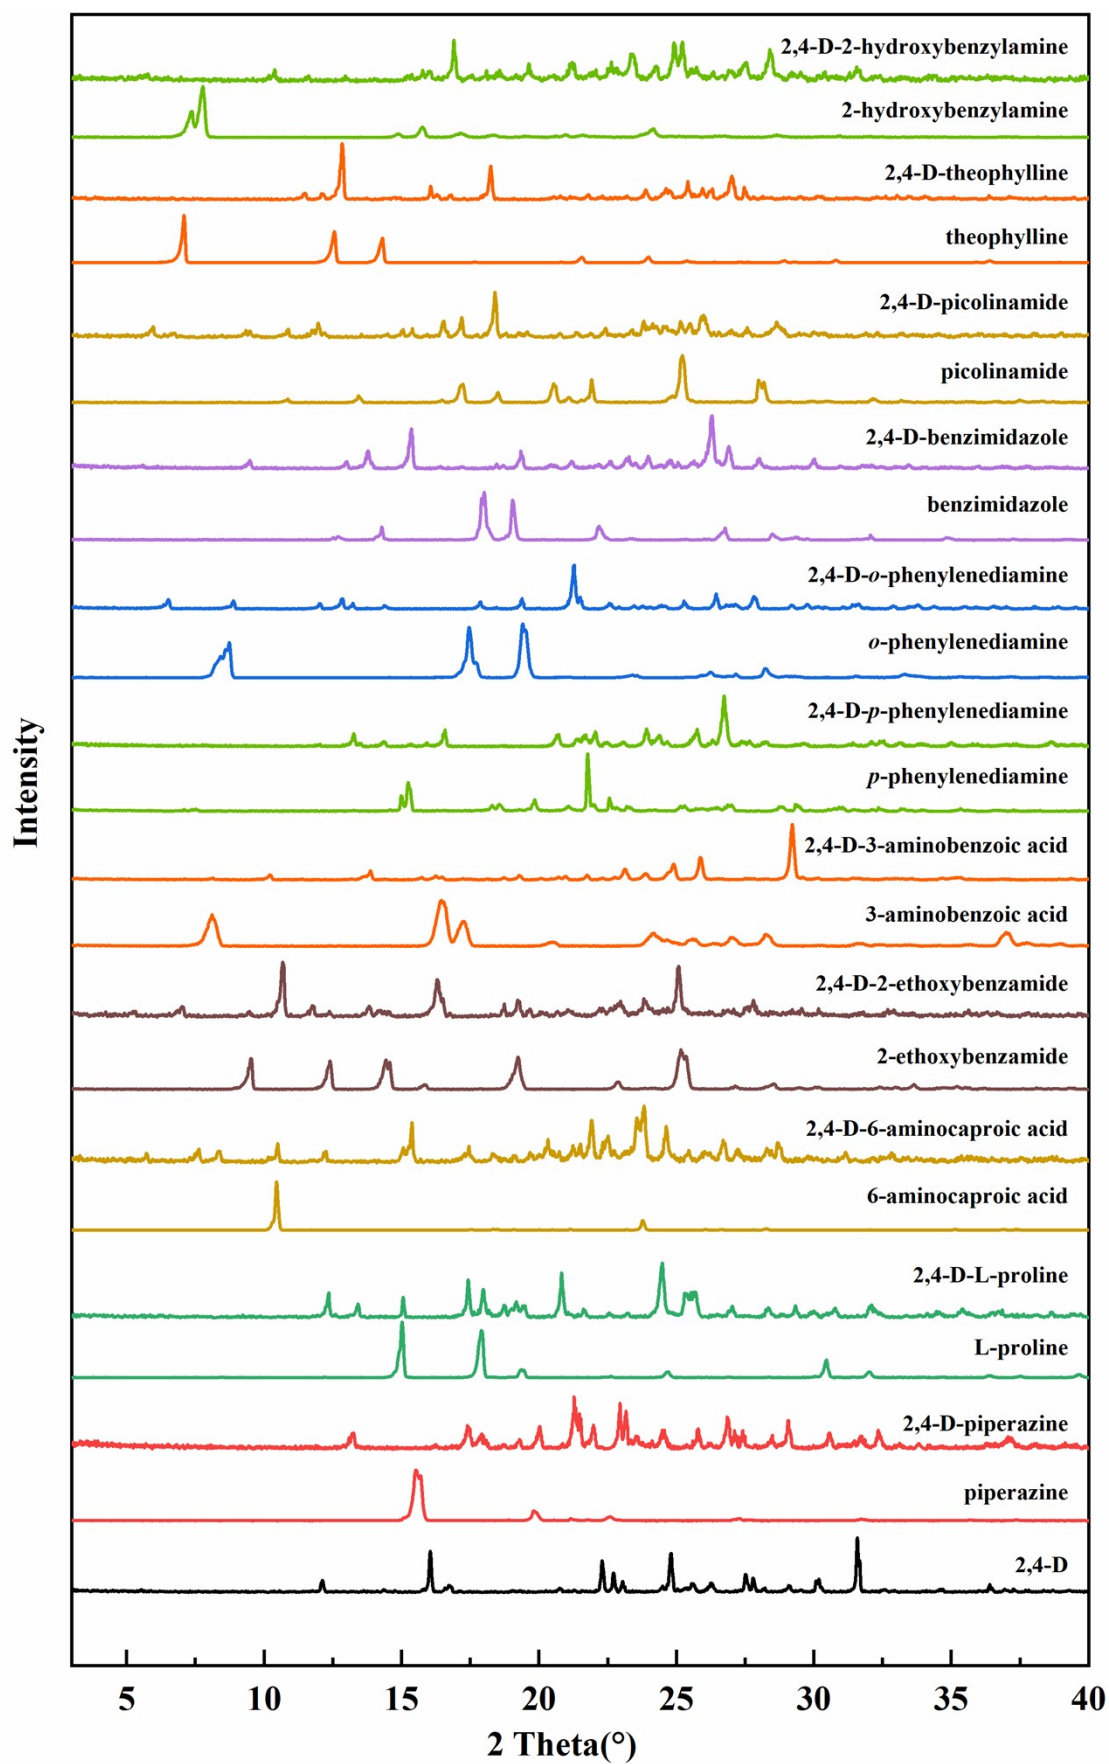

Figure S1 PXRD patterns of LAG experiment product with new phases.

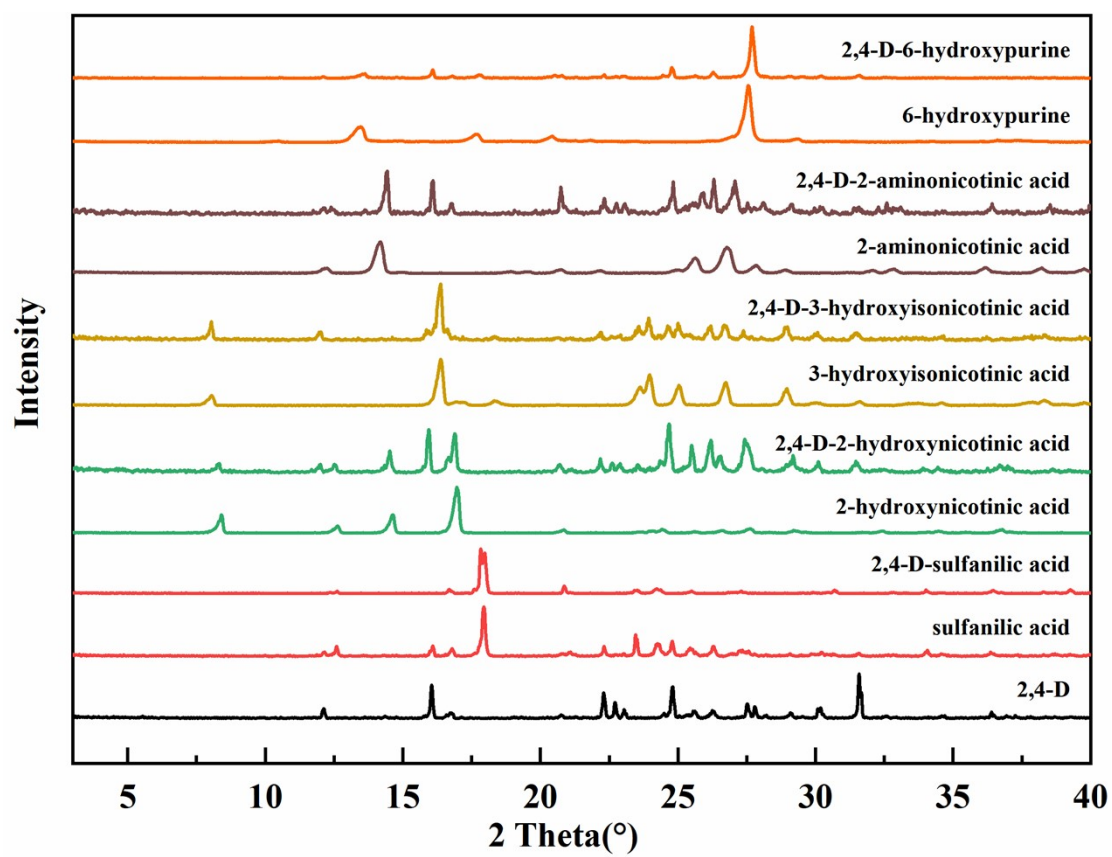

Figure S2 PXRD patterns of LAG experiment product without new phases.

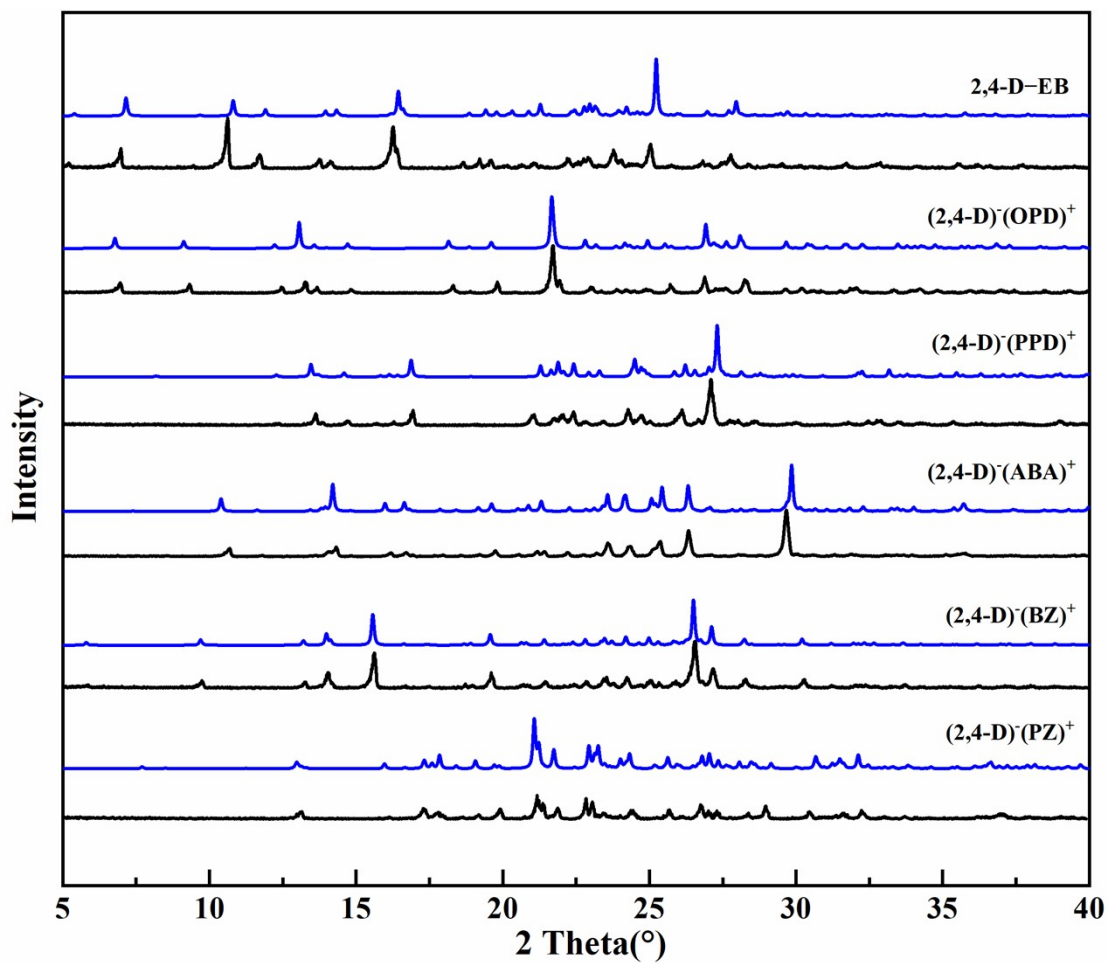

**Figure S3** PXR D patterns of multicomponent crystals (black and blue represent the results of slurry suspension experiments and software calculations, respectively).

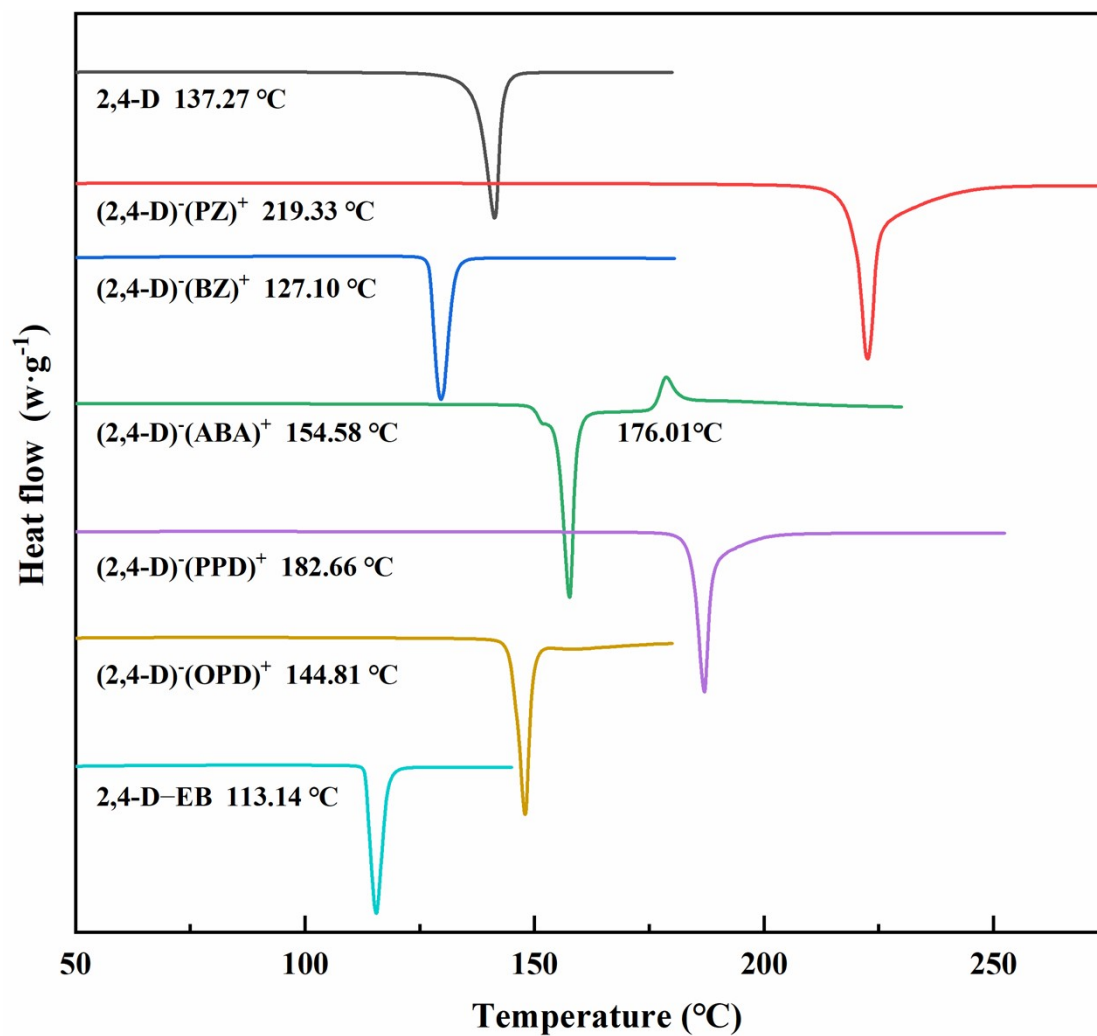

**Figure S4** DSC curves of 2,4-D, (2,4-D) $^{-}$ (PZ) $^{+}$ , (2,4-D) $^{-}$ (BZ) $^{+}$ , (2,4-D) $^{-}$ (ABA) $^{+}$ , (2,4-D) $^{-}$ (PPD) $^{+}$ , (2,4-D) $^{-}$ (OPD) $^{+}$ , and 2,4-D-EB.

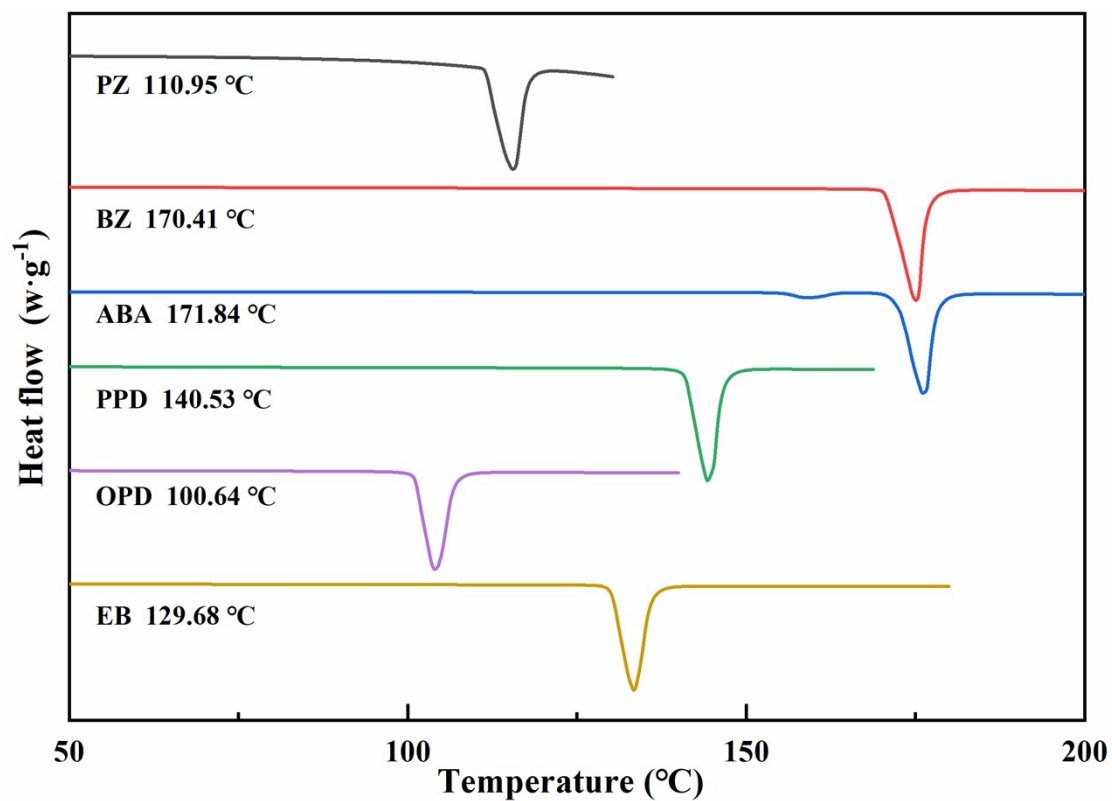

Figure S5 DSC curves of coformers in all multicomponent crystals.

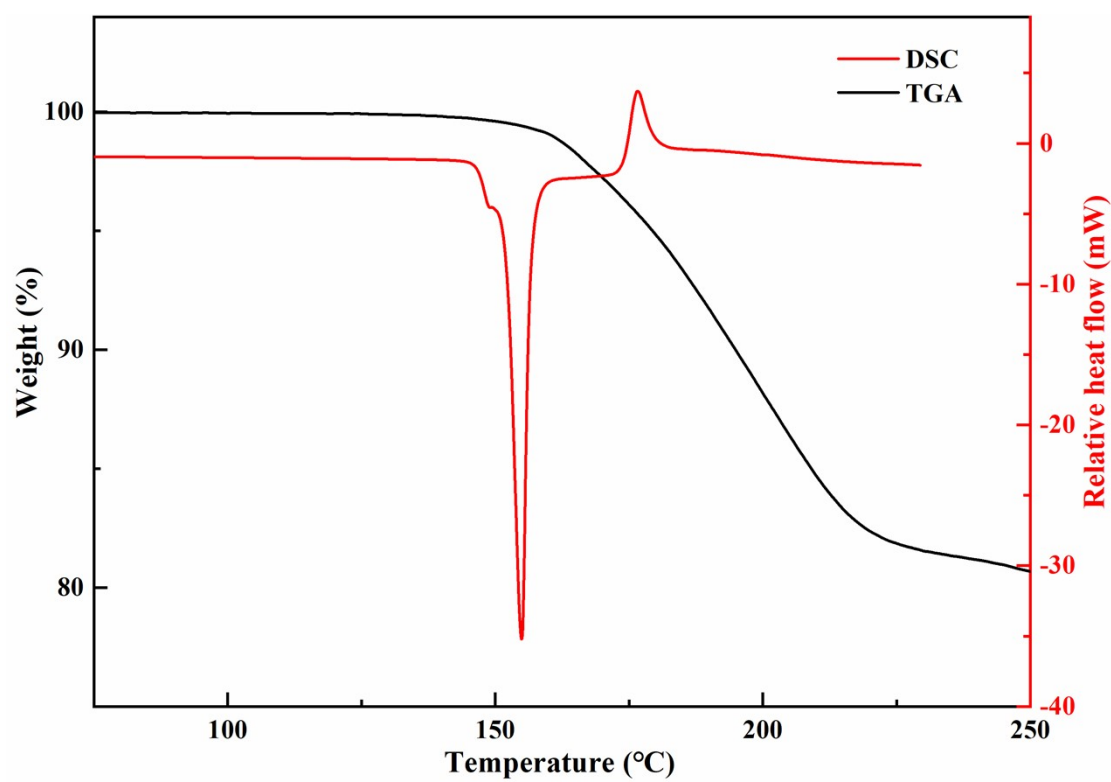

Figure S6 TGA and DSC curves of  $(2,4\text{-D})\text{-}(\text{ABA})^+$ .

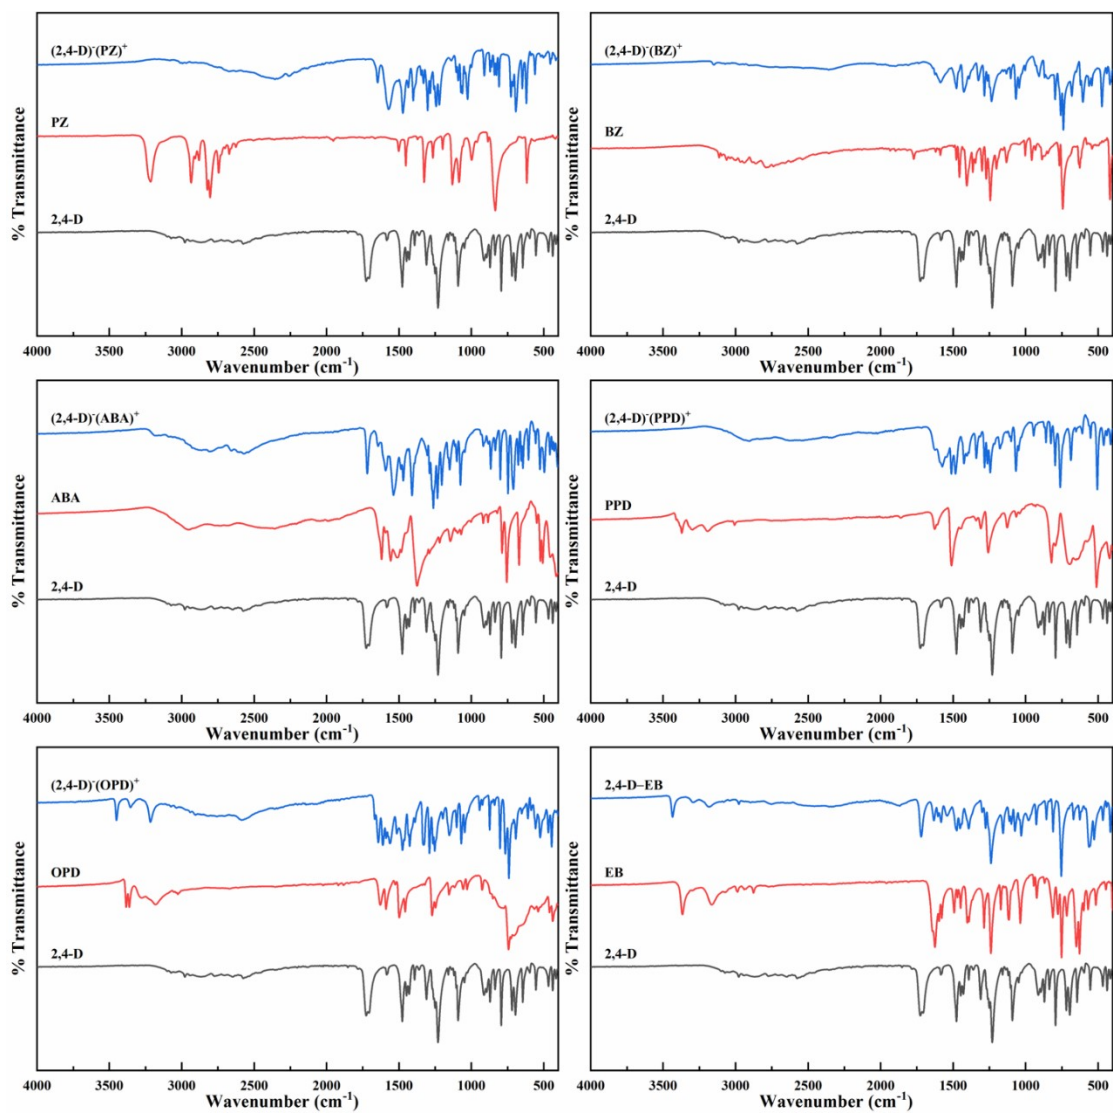

**Figure S7** FTIR spectra of the starting materials and multicomponent crystals.



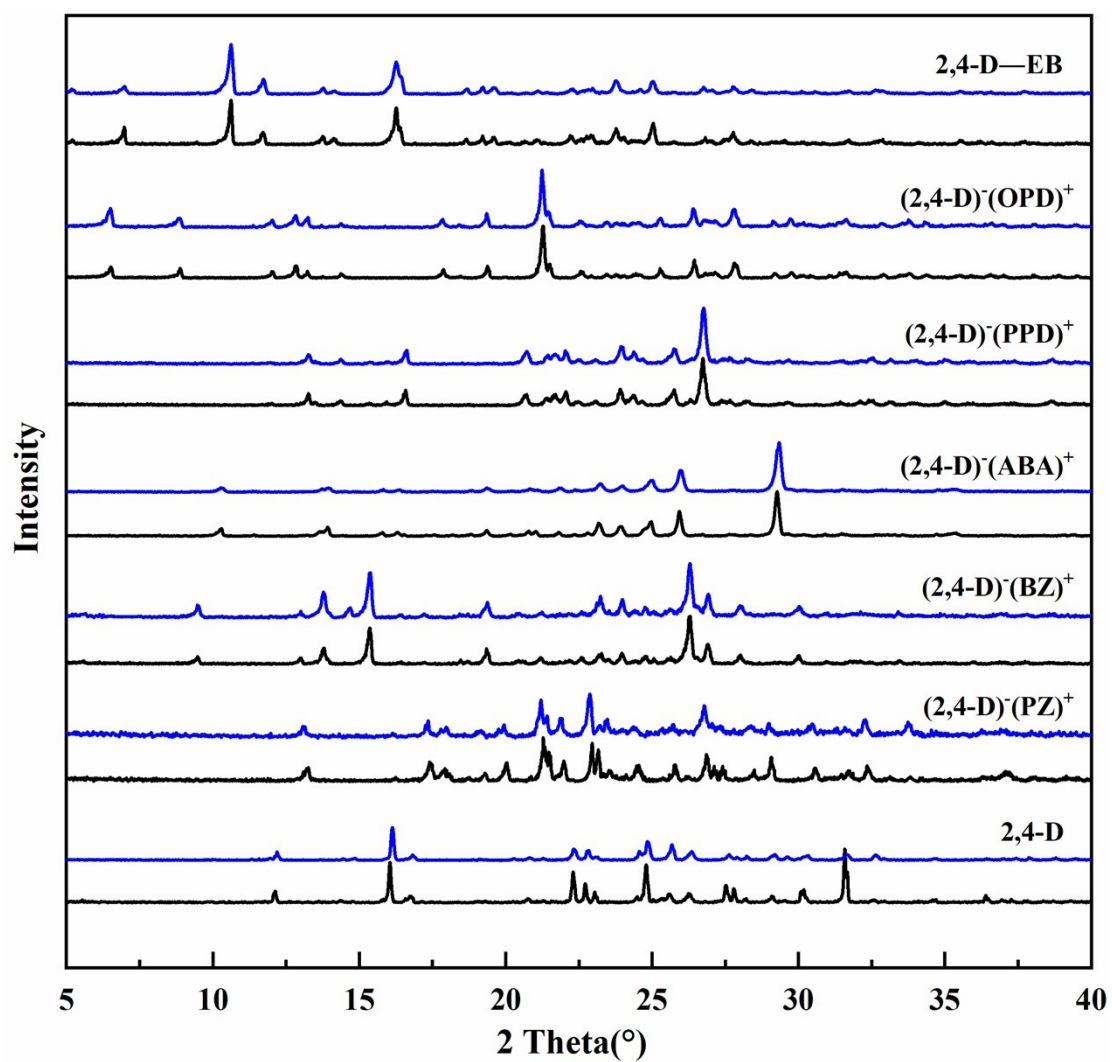

**Figure S8** The PXR D patterns of 2,4-D and multicomponent crystals before (black) and after (blue) equilibrium solubility experiment.

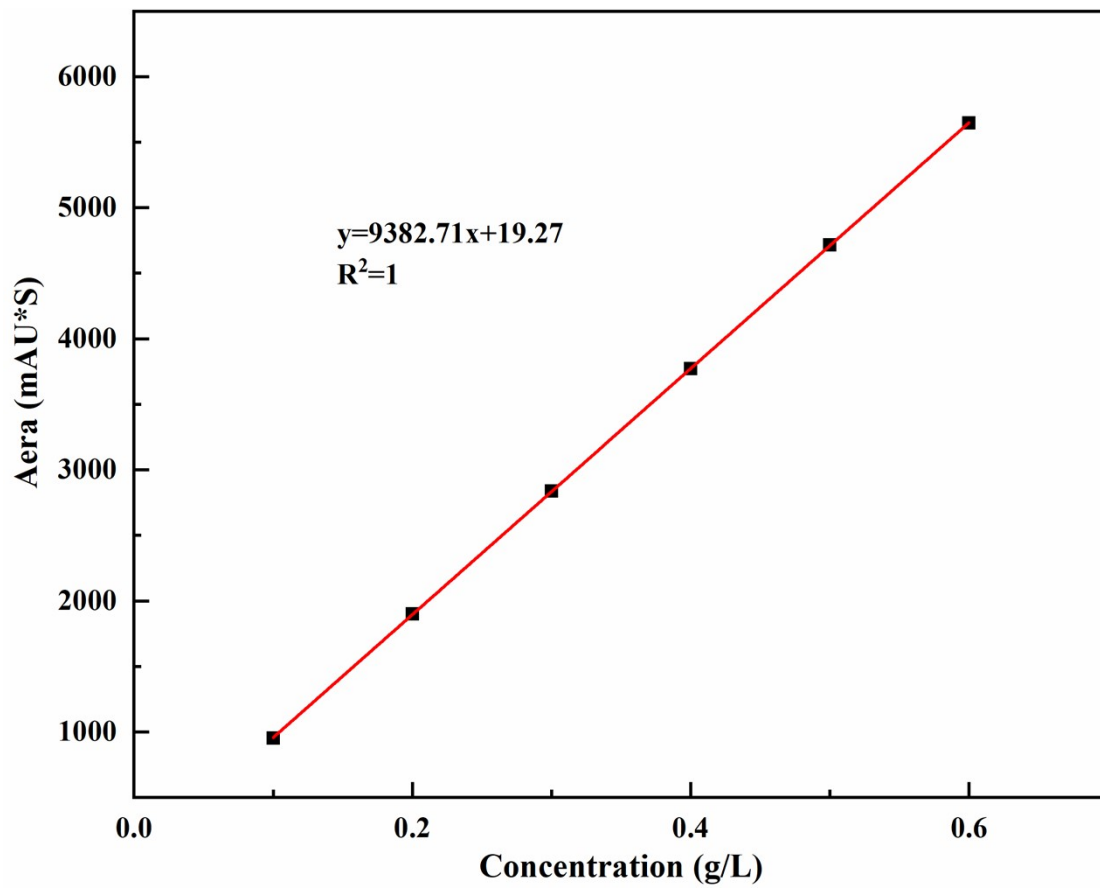

**Figure S9** The standard curve of pure 2,4-D solubility.



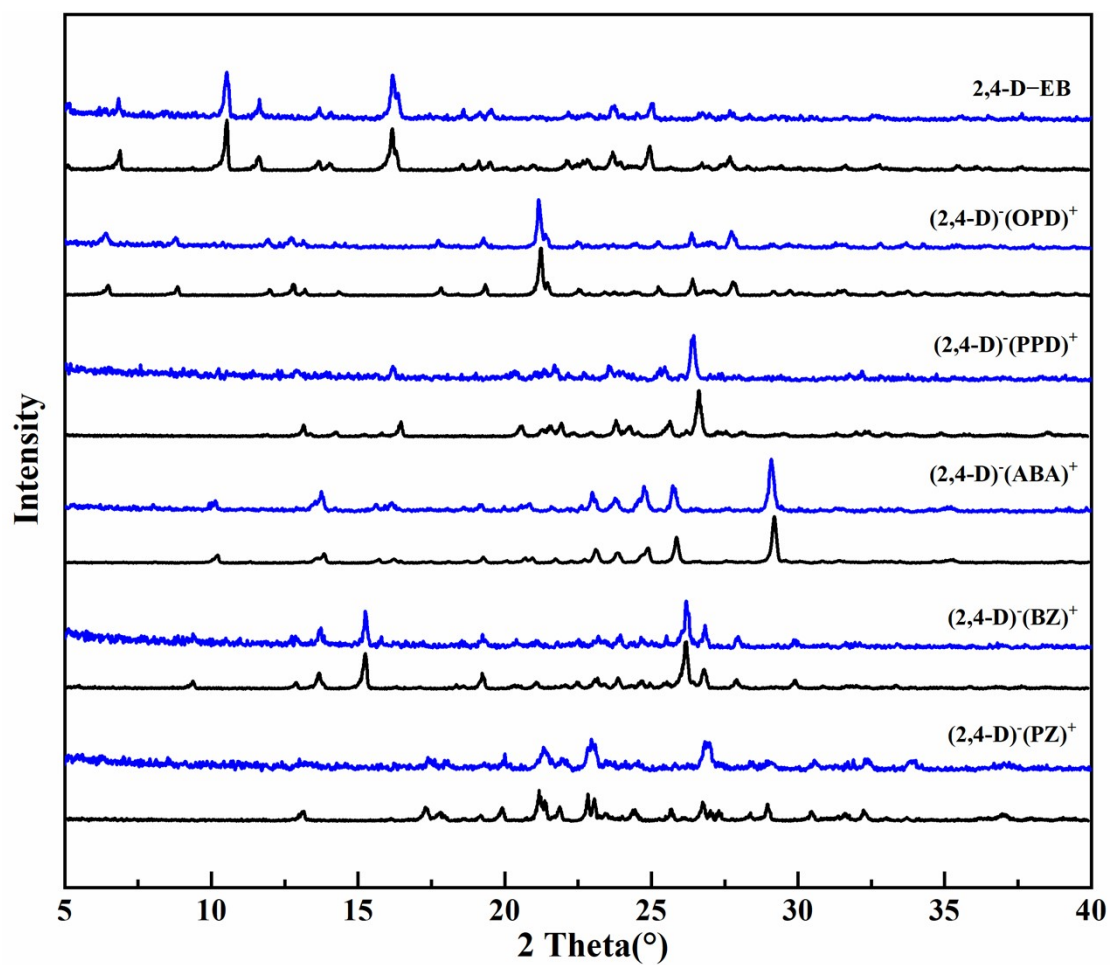

**Figure S10** The PXR D patterns of 2,4-D and multicomponent crystals before (black) and after (blue) accelerated stability experiment.

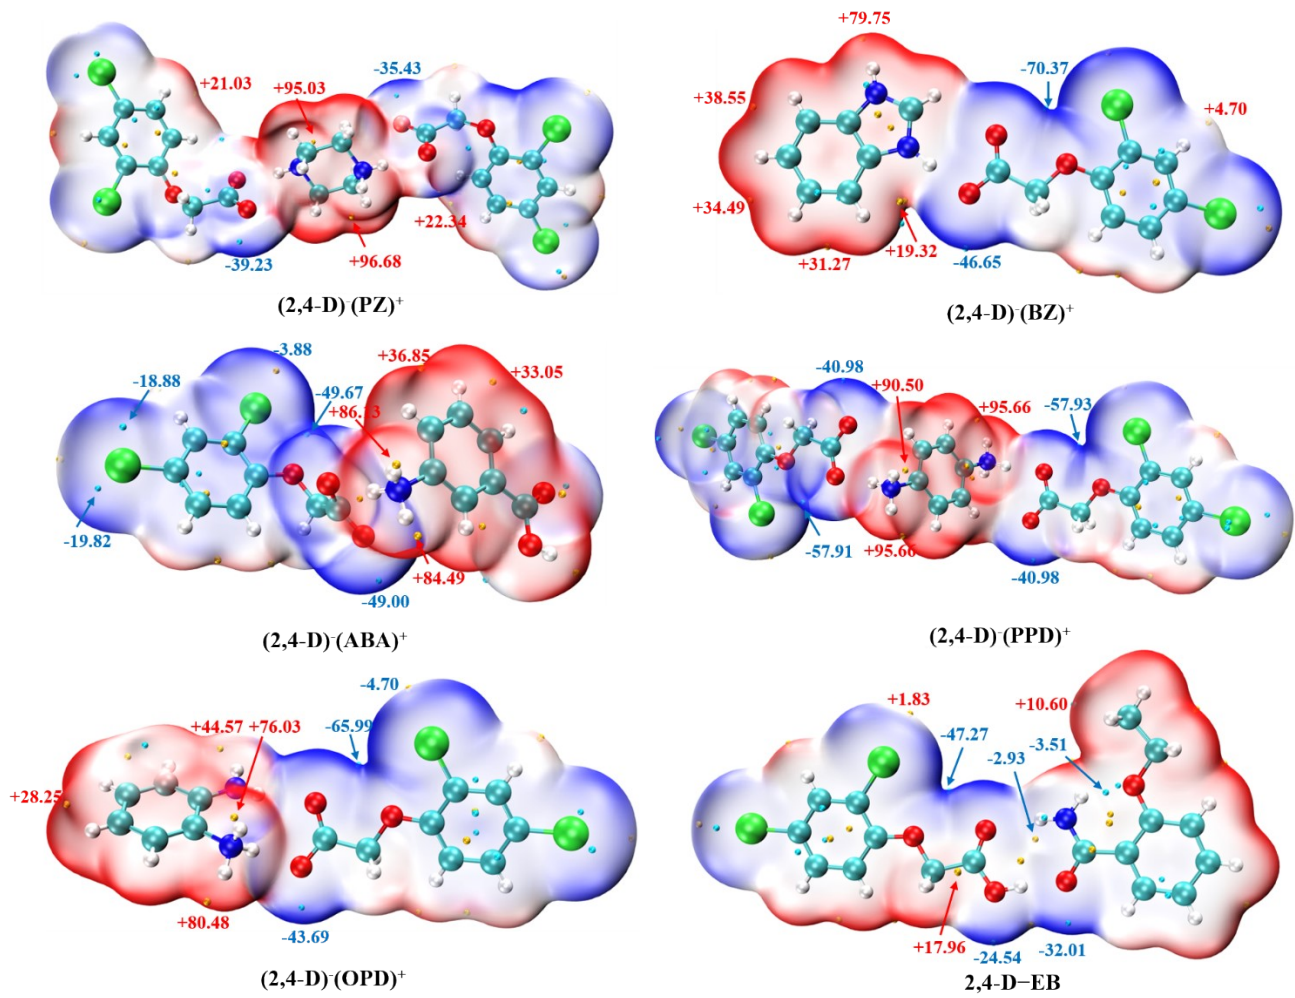

Figure S11 The MEPs of multicomponent crystals.

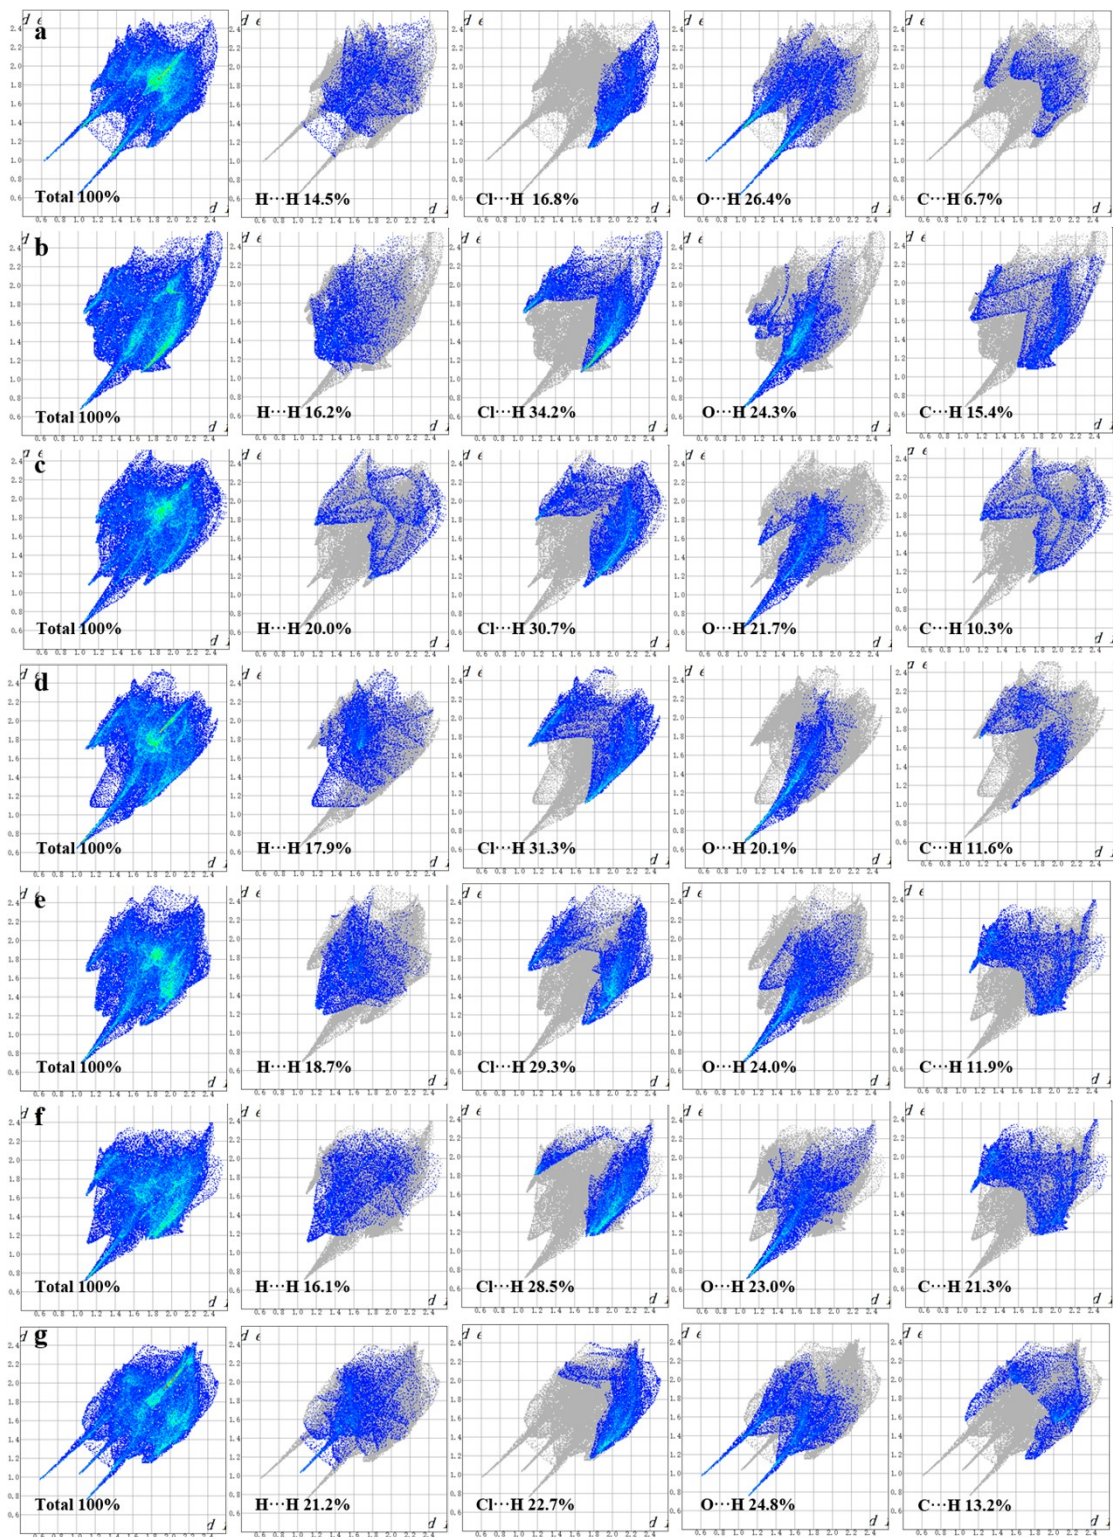

**Figure S12** Hirshfeld 2D fingerprint plots of 2,4-D and multicomponent crystals.

1. D. E. Lynch, C. J. Cooper, V. Chauhan, G. Smith, P. Healy and S. Parsons, *Australian Journal of Chemistry*, 1999, **52**, 695-703.

2. L. Fang, Y. Ma, Y. Xiao, Z. Li, Z. Gao, S. Wu, S. Rohani and J. Gong, *Crystal Growth & Design*, 2022, **22**, 1707-1719.
3. L. Fang, Y. Xiao, C. Zhang, Z. Gao, S. Wu, J. Gong and S. Rohani, *Crystengcomm*, 2021, **23**, 7615-7627.
4. D. E. Lynch, T. Latif, G. Smith, K. A. Byriel and C. H. L. Kennard, *Journal of Chemical Crystallography*, 1997, **27**, 567-575.
5. U. Mandal, S. Bhattacharya, K. Das and K. K. Kundu, *Zeitschrift Für Physikalische Chemie*, 1988, 159, 21-36.
6. <http://www.chemspider.com/Chemical-Structure.5593.html?rid=a535bf87-4740-42b9-8e6c-6c3e75154161>
7. B. Saikia, P. Bora, R. Khatioda and B. Sarma, *Crystal Growth & Design*, 2015, 15, 5593-5603.
8. Krut; Robinson, *Chemisches Zentralblatt*, 1927, 98, 1117.
9. <http://www.chemspider.com/Chemical-Structure.13837582.html?rid=3a667ebe-d12b-4a90-a648-9a3af38daf47>
